# Supplementary material
Source: PubMed Central journal article supplement (PMC2623299)
Supplement: cin-6-0203-s1.pdf [file cin-6-0203-s1.pdf]

**Supplementary Table 1. Protein likelihood ratios for 223 VUS in C-terminal DNA binding domain of BRCA2 from BIC.** Protein LR = likelihood ratio in favor of protein loss of function.

†Seen in one individual in a healthy control population of 180 (Australian Breast Cancer Family Study). \*\*HDR = homology directed repair assay [1] (Supplementary Table 2) ††LOH (loss of heterozygosity) in tumor tissue of variant allele increases probability that the variant is neutral. XOdds of causality from the Goldgar integrated likelihood method [2]. \*\*\*Myriad Genetics classifications provided by Amie Deffenbaugh.

| Variants | Protein LR | Protein LR Prediction | Myriad***    | Integrated Model Odds of Causality <sup>X</sup> | Functional | References         |
|----------|------------|-----------------------|--------------|-------------------------------------------------|------------|--------------------|
| L2480V   | 0.034      | Neutral               |              |                                                 |            |                    |
| S2483G   | 0.038      | Neutral               |              |                                                 |            |                    |
| S2483N   | 0.035      | Neutral               |              |                                                 |            |                    |
| R2488S   | 2.705      | Uncertain             |              |                                                 |            |                    |
| R2488K   | 0.131      | Neutral               |              |                                                 |            |                    |
| D2489G   | 0.119      | Neutral               |              |                                                 |            |                    |
| I2490T   | 0.033      | Neutral               | Polymorphism |                                                 |            | High BIC frequency |
|          |            | Likely deleterious    |              |                                                 |            |                    |
| R2494Q   | 24.867     | deleterious           |              |                                                 |            |                    |
| K2496T   | 0.499      | Neutral               |              |                                                 |            |                    |
| R2500T   | 0.451      | Neutral               |              |                                                 |            |                    |
| R2502C   | 0.175      | Neutral               |              | 21                                              |            |                    |
| R2502P   | 0.099      | Neutral               |              |                                                 |            |                    |
| R2502H   | 0.095      | Neutral               |              |                                                 |            |                    |
| F2504L   | 0.038      | Neutral               |              |                                                 |            |                    |
| G2508S   | 0.273      | Neutral               |              |                                                 |            |                    |
| L2510P   | 1.497      | Uncertain             |              |                                                 |            |                    |
| L2512F   | 0.055      | Neutral               |              |                                                 |            |                    |
| T2515I   | 0.074      | Neutral               | Polymorphism |                                                 |            | High BIC frequency |
| R2520Q   | 1.216      | Uncertain             |              |                                                 |            |                    |
| I2521T   | 0.040      | Neutral               |              |                                                 |            |                    |
| I2521V   | 0.033      | Neutral               |              |                                                 |            |                    |
|          |            | Likely deleterious    |              |                                                 |            |                    |
| S2522F   | 23.905     | deleterious           |              |                                                 |            |                    |
| G2528E   | 0.106      | Neutral               |              |                                                 |            |                    |
| S2533C   | 1.292      | Uncertain             |              |                                                 |            |                    |
| A2534V   | 2.446      | Uncertain             |              |                                                 |            |                    |
| H2537R   | 0.033      | Neutral               |              |                                                 |            |                    |
| T2542R   | 0.035      | Neutral               |              |                                                 |            |                    |
| V2545I   | 1.336      | Uncertain             |              |                                                 |            |                    |
| K2547E   | 0.535      | Neutral               |              |                                                 |            |                    |
| H2548R   | 0.032      | Neutral               |              |                                                 |            |                    |
| F2562L   | 0.054      | Neutral               |              |                                                 |            |                    |
| D2566Y   | 0.074      | Neutral               |              |                                                 |            |                    |
| E2571G   | 0.086      | Neutral               |              |                                                 |            |                    |
| L2581W   | 1.269      | Uncertain             |              |                                                 |            |                    |
| G2584D   | 6.239      | Uncertain             |              |                                                 |            |                    |
| G2585R   | 4.722      | Uncertain             |              |                                                 |            |                    |
| P2589H   | 2.873      | Uncertain             |              |                                                 |            |                    |
| N2591S   | 0.035      | Neutral               |              |                                                 |            |                    |
| A2595S   | 0.113      | Neutral               |              |                                                 |            |                    |
|          |            | Likely deleterious    |              |                                                 |            |                    |
| T2607P   | 11.912     | deleterious           |              |                                                 |            |                    |
|          |            | Likely deleterious    |              |                                                 |            |                    |
| G2609D   | 33.476     | deleterious           |              |                                                 |            |                    |
| D2611G   | 0.085      | Neutral               |              |                                                 |            |                    |
|          |            | Likely deleterious    |              |                                                 |            |                    |
| H2623R   | 17.554     | deleterious           |              |                                                 |            |                    |

| Variants | Protein LR | Protein LR Prediction | Myriad***             | Integrated Model Odds of Causality <sup>x</sup> | Functional      | References                                                                                        |
|----------|------------|-----------------------|-----------------------|-------------------------------------------------|-----------------|---------------------------------------------------------------------------------------------------|
| W2626C   | 100.037    | Likely deleterious    |                       | 48                                              |                 |                                                                                                   |
| I2627F   | 17.940     | Likely deleterious    |                       | 1046                                            |                 |                                                                                                   |
| P2639A   | 1.901      | Uncertain             |                       |                                                 |                 |                                                                                                   |
| A2643V   | 0.101      | Neutral               |                       |                                                 |                 |                                                                                                   |
| A2643G   | 0.070      | Neutral               |                       |                                                 |                 |                                                                                                   |
| N2644S   | 0.057      | Neutral               |                       |                                                 |                 |                                                                                                   |
| L2647P   | 8.778      | Likely deleterious    |                       |                                                 |                 |                                                                                                   |
| L2653P   | 69.681     | Likely deleterious    |                       | 24                                              |                 |                                                                                                   |
| L2654P   | 9.634      | Likely deleterious    |                       |                                                 |                 |                                                                                                   |
| Q2655R   | 14.769     | Likely deleterious    |                       |                                                 |                 |                                                                                                   |
| R2659G   | 186.215    | Likely deleterious    |                       |                                                 |                 |                                                                                                   |
| R2659T   | 160.838    | Likely deleterious    | Suspected Deleterious | 3339                                            |                 | Predicted as deleterious in [1]                                                                   |
| R2659K   | 4.629      | Uncertain             |                       |                                                 |                 | Produces aberrant splicing [3]                                                                    |
| Y2660D   | 49.121     | Likely deleterious    |                       |                                                 |                 |                                                                                                   |
| E2663V   | 70.926     | Likely deleterious    |                       | 233                                             |                 |                                                                                                   |
| E2663K   | 18.055     | Likely deleterious    |                       |                                                 |                 |                                                                                                   |
| D2665G   | 0.168      | Neutral               | Polymorphism          | 0.002                                           |                 | Enriched in a healthy control population <sup>†</sup> and LOH in variant allele <sup>††</sup> [4] |
| R2666T   | 0.216      | Neutral               |                       |                                                 |                 |                                                                                                   |
| S2670L   | 191.227    | Likely deleterious    |                       |                                                 | impaired HDR**  | LOH in variant allele <sup>††</sup> [4]                                                           |
| I2672V   | 0.246      | Neutral               |                       |                                                 |                 |                                                                                                   |
| M2676T   | 0.044      | Neutral               |                       |                                                 | competent HDR** |                                                                                                   |
| R2678G   | 18.113     | Likely deleterious    |                       |                                                 |                 |                                                                                                   |
| D2679Y   | 52.441     | Likely deleterious    |                       |                                                 |                 |                                                                                                   |
| D2679G   | 41.704     | Likely deleterious    |                       |                                                 |                 |                                                                                                   |
| D2680G   | 0.096      | Neutral               |                       |                                                 |                 |                                                                                                   |
| K2684R   | 0.145      | Neutral               |                       |                                                 |                 |                                                                                                   |
| L2686P   | 42.616     | Likely deleterious    |                       |                                                 |                 |                                                                                                   |
| V2687F   | 170.909    | Likely deleterious    |                       |                                                 |                 |                                                                                                   |
| L2688P   | 191.184    | Likely deleterious    |                       |                                                 |                 |                                                                                                   |
| S2691F   | 25.395     | Likely deleterious    |                       |                                                 |                 |                                                                                                   |
| S2695L   | 1.007      | Uncertain             |                       |                                                 |                 |                                                                                                   |
| S2697N   | 0.043      | Neutral               |                       |                                                 |                 |                                                                                                   |
| I2700L   | 0.032      | Neutral               |                       |                                                 |                 |                                                                                                   |
| S2704F   | 0.053      | Neutral               |                       |                                                 |                 |                                                                                                   |
| N2706S   | 0.048      | Neutral               |                       |                                                 |                 |                                                                                                   |
| D2712N   | 0.056      | Neutral               |                       |                                                 |                 |                                                                                                   |
| D2712V   | 0.043      | Neutral               |                       |                                                 |                 |                                                                                                   |
| Q2714R   | 0.038      | Neutral               |                       |                                                 |                 |                                                                                                   |
| A2717S   | 0.045      | Neutral               | Polymorphism          |                                                 |                 | High BIC frequency                                                                                |
| I2718T   | 0.251      | Neutral               |                       |                                                 |                 |                                                                                                   |
| L2721H   | 98.117     | Likely deleterious    |                       |                                                 | impaired HDR**  |                                                                                                   |

| Variants | Protein LR | Protein LR Prediction | Myriad***    | Integrated Model Odds of Causality <sup>x</sup> | Functional      | References                             |
|----------|------------|-----------------------|--------------|-------------------------------------------------|-----------------|----------------------------------------|
| T2722R   | 35.193     | Likely deleterious    |              | 93                                              |                 |                                        |
| D2723G   | 65.119     | Likely deleterious    |              |                                                 |                 |                                        |
| D2723A   | 55.652     | Likely deleterious    |              | 121                                             | impaired HDR**  |                                        |
| D2723H   | 13.116     | Likely deleterious    | Deleterious  |                                                 | impaired HDR**  | Predicted as likely deleterious in [2] |
| G2724V   | 26.336     | Likely deleterious    |              |                                                 |                 |                                        |
| Y2726C   | 31.697     | Likely deleterious    |              |                                                 |                 |                                        |
| V2728I   | 0.615      | Neutral               | Polymorphism |                                                 |                 | High BIC frequency                     |
| V2728L   | 0.123      | Neutral               |              |                                                 |                 |                                        |
| K2729N   | 3.040      | Uncertain             |              | 0.002                                           |                 |                                        |
| A2730P   | 178.756    | Likely deleterious    |              |                                                 |                 |                                        |
| A2730V   | 28.610     | Likely deleterious    |              |                                                 |                 |                                        |
| V2739I   | 0.033      | Neutral               |              |                                                 | competent HDR** |                                        |
| G2748D   | 6.830      | Likely deleterious    |              | 2494                                            |                 |                                        |
| I2752F   | 0.231      | Neutral               |              |                                                 |                 |                                        |
| M2775R   | 0.120      | Neutral               |              |                                                 |                 |                                        |
| M2775T   | 0.047      | Neutral               |              |                                                 |                 |                                        |
| R2784W   | 118.033    | Likely deleterious    |              |                                                 |                 |                                        |
| R2784Q   | 7.243      | Likely deleterious    |              |                                                 |                 |                                        |
| A2786P   | 95.379     | Likely deleterious    |              |                                                 |                 |                                        |
| R2787C   | 115.727    | Likely deleterious    |              |                                                 |                 |                                        |
| R2787H   | 0.342      | Neutral               |              |                                                 |                 |                                        |
| W2788S   | 45.999     | Likely deleterious    |              |                                                 |                 |                                        |
| W2788R   | 21.840     | Likely deleterious    |              |                                                 |                 |                                        |
| T2790S   | 1.870      | Uncertain             |              |                                                 |                 |                                        |
| L2792P   | 201.610    | Likely deleterious    |              |                                                 |                 |                                        |
| G2793E   | 9.375      | Likely deleterious    |              |                                                 |                 |                                        |
| G2793R   | 7.648      | Likely deleterious    |              |                                                 |                 |                                        |
| F2794L   | 0.116      | Neutral               |              |                                                 |                 |                                        |
| P2800R   | 0.501      | Neutral               |              |                                                 |                 |                                        |
| P2800S   | 0.188      | Neutral               |              |                                                 |                 |                                        |
| S2807L   | 0.996      | Uncertain             |              |                                                 |                 |                                        |
| S2810G   | 0.042      | Neutral               |              |                                                 |                 |                                        |
| D2811G   | 0.033      | Neutral               |              |                                                 |                 |                                        |
| G2812E   | 7.139      | Likely deleterious    |              |                                                 |                 |                                        |
| G2813E   | 79.102     | Likely deleterious    |              |                                                 |                 |                                        |
| V2815I   | 0.617      | Uncertain             |              |                                                 |                 |                                        |
| V2818I   | 0.103      | Neutral               |              |                                                 |                 |                                        |
| V2820L   | 26.066     | Likely deleterious    |              |                                                 |                 |                                        |
| I2821T   | 0.978      | Uncertain             |              |                                                 |                 |                                        |
| I2828V   | 0.050      | Neutral               |              |                                                 |                 |                                        |
| Q2829L   | 0.074      | Neutral               |              |                                                 |                 |                                        |
| S2835P   | 0.033      | Neutral               | Polymorphism |                                                 | competent HDR** |                                        |

| Variants | Protein LR | Protein LR Prediction | Myriad***    | Integrated Model Odds of Causality <sup>x</sup> | Functional      | References                                                                                                 |
|----------|------------|-----------------------|--------------|-------------------------------------------------|-----------------|------------------------------------------------------------------------------------------------------------|
| I2840V   | 0.035      | Neutral               |              |                                                 |                 |                                                                                                            |
| R2842C   | 184.961    | Likely deleterious    |              |                                                 |                 |                                                                                                            |
| R2842L   | 39.694     | Likely deleterious    |              | 6.35E-04                                        |                 |                                                                                                            |
| R2842H   | 1.148      | Uncertain             |              |                                                 |                 |                                                                                                            |
| N2843S   | 0.103      | Neutral               |              |                                                 |                 |                                                                                                            |
| E2847K   | 3.239      | Uncertain             |              |                                                 |                 |                                                                                                            |
| K2849E   | 1.854      | Uncertain             |              |                                                 |                 |                                                                                                            |
| E2850K   | 0.383      | Neutral               |              |                                                 |                 |                                                                                                            |
| E2856A   | 0.073      | Neutral               | Polymorphism |                                                 |                 | Enriched in a healthy control population† and LOH in variant allele <sup>††</sup> [4]. High BIC frequency. |
| Q2858K   | 0.660      | Uncertain             |              |                                                 |                 |                                                                                                            |
| Q2858R   | 0.036      | Neutral               |              |                                                 |                 |                                                                                                            |
| A2864V   | 0.128      | Neutral               |              |                                                 |                 |                                                                                                            |
| L2865V   | 0.230      | Neutral               |              |                                                 |                 |                                                                                                            |
| T2867P   | 0.397      | Neutral               |              |                                                 |                 |                                                                                                            |
| F2873C   | 0.977      | Uncertain             |              |                                                 |                 |                                                                                                            |
| P2883S   | 0.032      | Neutral               |              |                                                 |                 |                                                                                                            |
| R2888L   | 1.112      | Uncertain             |              | 8.00E-04                                        |                 |                                                                                                            |
| R2888C   | 0.447      | Neutral               |              |                                                 |                 |                                                                                                            |
| R2888P   | 0.311      | Neutral               |              |                                                 |                 |                                                                                                            |
| A2889S   | 0.040      | Neutral               |              |                                                 |                 |                                                                                                            |
| L2890I   | 0.073      | Neutral               |              |                                                 |                 |                                                                                                            |
| R2896H   | 0.086      | Neutral               |              |                                                 | competent HDR** |                                                                                                            |
| G2901D   | 5.954      | Uncertain             |              |                                                 |                 |                                                                                                            |
| V2908G   | 1.879      | Uncertain             |              | 0.004                                           | competent HDR** |                                                                                                            |
| A2911V   | 0.141      | Neutral               |              |                                                 |                 |                                                                                                            |
| G2919V   | 0.034      | Neutral               |              |                                                 |                 |                                                                                                            |
| S2922G   | 0.743      | Uncertain             |              |                                                 |                 |                                                                                                            |
| Q2925R   | 6.931      | Likely deleterious    |              |                                                 |                 |                                                                                                            |
| Q2925H   | 5.282      | Uncertain             |              |                                                 |                 |                                                                                                            |
| L2936M   | 0.111      | Neutral               |              |                                                 |                 |                                                                                                            |
| L2936F   | 0.071      | Neutral               |              |                                                 |                 |                                                                                                            |
| A2942T   | 0.087      | Neutral               |              |                                                 |                 |                                                                                                            |
| I2944F   | 0.199      | Neutral               | Polymorphism |                                                 |                 | High BIC frequency                                                                                         |
| K2950N   | 0.537      | Neutral               |              | 7.15E-10                                        |                 | High BIC frequency                                                                                         |
| A2951T   | 0.074      | Neutral               |              |                                                 |                 |                                                                                                            |
| D2965H   | 0.091      | Neutral               |              |                                                 |                 |                                                                                                            |
| V2969M   | 17.047     | Likely deleterious    |              |                                                 |                 |                                                                                                            |
| L2972W   | 107.825    | Likely deleterious    |              |                                                 |                 |                                                                                                            |
| R2973C   | 70.762     | Likely deleterious    |              | 1.75E-04                                        | competent HDR** |                                                                                                            |
| R2973H   | 0.324      | Neutral               |              |                                                 |                 |                                                                                                            |
| K2982Q   | 0.077      | Neutral               |              |                                                 |                 |                                                                                                            |
| S2988G   | 14.558     | Likely deleterious    |              |                                                 |                 |                                                                                                            |
| R2991H   | 0.433      | Neutral               |              |                                                 |                 |                                                                                                            |
| E3002D   | 84.493     | Likely deleterious    |              |                                                 |                 |                                                                                                            |
| E3002K   | 33.891     | Likely deleterious    |              |                                                 |                 |                                                                                                            |
| L3011P   | 118.966    | Likely deleterious    |              |                                                 |                 |                                                                                                            |
| T3013I   | 0.247      | Neutral               | Polymorphism |                                                 |                 | High BIC frequency                                                                                         |
| S3020C   | 0.042      | Neutral               |              |                                                 |                 |                                                                                                            |
| Q3026E   | 0.727      | Uncertain             |              |                                                 |                 |                                                                                                            |
| A3028P   | 0.034      | Neutral               |              |                                                 |                 |                                                                                                            |

| Variants | Protein LR | Protein LR Prediction | Myriad***          | Integrated Model Odds of Causality <sup>x</sup> | Functional     | References |
|----------|------------|-----------------------|--------------------|-------------------------------------------------|----------------|------------|
| A3029V   | 0.246      | Neutral               |                    |                                                 |                |            |
| A3029T   | 0.133      | Neutral               |                    |                                                 |                |            |
| Q3034R   | 0.035      | Neutral               |                    |                                                 |                |            |
| Y3035S   | 165.485    | Likely deleterious    |                    |                                                 |                |            |
| Y3035C   | 164.959    | Likely deleterious    |                    |                                                 |                |            |
| P3039L   | 0.074      | Neutral               |                    |                                                 |                |            |
| V3040I   | 0.320      | Neutral               |                    |                                                 |                |            |
| R3052W   | 33.692     | Likely deleterious    |                    | 0.003                                           |                |            |
| R3052Q   | 2.166      | Uncertain             |                    |                                                 |                |            |
| P3054H   | 1.734      | Uncertain             |                    |                                                 |                |            |
| S3058G   | 0.048      | Neutral               |                    |                                                 |                |            |
| K3059E   | 3.937      | Uncertain             |                    |                                                 |                |            |
| P3063S   | 0.035      | Neutral               |                    |                                                 |                |            |
| D3064Y   | 0.062      | Neutral               |                    |                                                 |                |            |
| D3064N   | 0.036      | Neutral               |                    |                                                 |                |            |
| F3065L   | 0.032      | Neutral               |                    |                                                 |                |            |
| Q3066E   | 0.059      | Neutral               |                    |                                                 |                |            |
| E3071D   | 1.664      | Uncertain             |                    |                                                 |                |            |
| V3072E   | 18.936     | Likely deleterious    |                    |                                                 |                |            |
| D3073G   | 12.265     | Likely deleterious    |                    |                                                 |                |            |
| G3076E   | 12.781     | Likely deleterious    |                    |                                                 |                |            |
| G3076V   | 5.000      | Uncertain             |                    |                                                 | impaired HDR** |            |
| V3079I   | 0.069      | Neutral               |                    | 6.47E-04                                        |                |            |
| V3081A   | 0.400      | Neutral               |                    |                                                 |                |            |
| K3083E   | 0.235      | Neutral               |                    |                                                 |                |            |
| K3083N   | 0.072      | Neutral               |                    |                                                 |                |            |
| A3088V   | 7.760      | Likely deleterious    |                    |                                                 |                |            |
| V3091S   | 9.047      | Likely deleterious    |                    |                                                 |                |            |
| Y3092C   | 110.954    | Likely deleterious    |                    | 0.006                                           |                |            |
| Y3092S   | 22.321     | Likely deleterious    |                    |                                                 |                |            |
| D3095E   | 11.009     | Likely deleterious    |                    | 23                                              |                |            |
| Y3098H   | 1.041      | Uncertain             | Favor Polymorphism | 3.46E-04                                        |                |            |
| L3101R   | 36.547     | Likely deleterious    |                    |                                                 |                |            |
| L3101V   | 0.119      | Neutral               |                    |                                                 |                |            |
| I3103M   | 0.299      | Neutral               |                    |                                                 |                |            |
| I3103V   | 0.053      | Neutral               |                    |                                                 |                |            |
| H3117P   | 4.212      | Uncertain             |                    |                                                 |                |            |
| M3118T   | 0.034      | Neutral               |                    |                                                 |                |            |
| S3123G   | 5.272      | Uncertain             |                    |                                                 |                |            |
| N3124I   | 83.538     | Likely deleterious    |                    |                                                 |                |            |
| L3125H   | 111.532    | Likely deleterious    |                    |                                                 |                |            |
| P3129A   | 0.043      | Neutral               |                    |                                                 |                |            |
| G3134V   | 0.302      | Neutral               |                    |                                                 |                |            |
| D3142G   | 0.059      | Neutral               |                    |                                                 |                |            |
| P3150L   | 5.063      | Uncertain             |                    |                                                 |                |            |
| E3152G   | 0.694      | Neutral               |                    |                                                 |                |            |
| E3152K   | 0.084      | Neutral               |                    |                                                 |                |            |
| G3153A   | 0.035      | Neutral               |                    |                                                 |                |            |
| F3159L   | 0.051      | Neutral               |                    |                                                 |                |            |

| Variants | Protein LR | Protein LR Prediction | Myriad*** | Integrated Model Odds of Causality <sup>x</sup> | Functional | References |
|----------|------------|-----------------------|-----------|-------------------------------------------------|------------|------------|
| E3167A   | 0.069      | Neutral               |           |                                                 |            |            |
| D3170G   | 2.060      | Uncertain             |           | 0.001                                           |            |            |
| M3181R   | 0.228      | Neutral               |           |                                                 |            |            |
| D3188N   | 0.034      | Neutral               |           |                                                 |            |            |

## References

1. Wu, K., et al., *Functional evaluation and cancer risk assessment of BRCA2 unclassified variants*. *Cancer Res*, 2005. **65**(2): p. 417-426.
2. Easton, D.F., et al., *A Systematic Genetic Assessment of 1,433 Sequence Variants of Unknown Clinical Significance in the BRCA1 and BRCA2 Breast Cancer Predisposition Genes*. *American Journal of Human Genetics*, 2007. **Early Access**.
3. Hofmann, W., et al., *The BRCA2 variant 8204G>A is a splicing mutation and results in an in frame deletion of the gene*. *J Med Genet*, 2003. **40**(3): p. e23.
4. Chenevix-Trench, G., et al., *Genetic and Histopathologic Evaluation of BRCA1 and BRCA2 DNA Sequence Variants of Unknown Clinical Significance*. *Cancer Research*, 2006. **66**(4): p. 2019-2027.

**Supplementary Table 2. Homology-directed repair assay results for eleven BRCA2 variants using direct repeat (DR) green fluorescent protein (GFP).** wt = wild-type. Fold increase in GFP+ cells counted by Fluorescent-Activated Cell Sorting (FACS) 72 hours after transfection of VC8-DR-GRP cells. 3X = three repetitions of the experiment [1]. Impaired homologous recombination is defined as fold increase in GFP positive cells after 72 hours < 2.0. and competent homologous recombination as fold increase > 3.5.

|          | Fold increase<br>in number of<br>GFP+ cells | Standard<br>error (3X) |
|----------|---------------------------------------------|------------------------|
| Vector   | 1.0                                         | 0.1                    |
| BRCA2-wt | 5.4                                         | 0.2                    |
| S2670L   | 1.9                                         | 0.1                    |
| M2676T   | 3.9                                         | 0.6                    |
| L2721H   | 1.7                                         | 0.1                    |
| D2723G   | 1.3                                         | 0.1                    |
| D2723H   | 1.4                                         | 0.1                    |
| K2729N   | 4.4                                         | 0.5                    |
| V2739I   | 3.8                                         | 0.2                    |
| R2896H   | 5.2                                         | 0.7                    |
| V2908G   | 5.3                                         | 0.1                    |
| R2973C   | 4.2                                         | 0.4                    |
| G3076V   | 1.8                                         | 0.1                    |

## References

1. Wu, K., et al., *Functional evaluation and cancer risk assessment of BRCA2 unclassified variants*. Cancer Res, 2005. **65**(2): p. 417-426.
